# Supplementary material
Source: publisher figshare collection journal article supplement (https://acs.figshare.com/ndownloader/files/15474134)
Supplement: Supplementary file 1 [file 15474134]

---

Supporting Information

**Comprehensive evaluation of surface potential characteristics on mesenchymal stem cells' osteogenic differentiation**

Fei Jia<sup>1</sup>, Suya Lin<sup>1</sup>, Xuzhao He<sup>1</sup>, Jiamin Zhang<sup>1</sup>, Shuxian Shen<sup>1</sup>, Zhiying Wang<sup>1</sup>, Bolin Tang<sup>1,2</sup>, Cheng Li<sup>1</sup>, Yongjun Wu<sup>1</sup>, Lingqing Dong<sup>1,3</sup>, Kui Cheng<sup>1</sup>, Wenjian Weng<sup>1,\*</sup>

<sup>1</sup>School of Materials Science and Engineering, State Key Laboratory of Silicon Materials, Zhejiang University, Hangzhou 310027, China.

<sup>2</sup>College of Materials and Textile Engineering, Jiaxing University, Jiaxing 314001, China.

<sup>3</sup>The Stomatologic Hospital, School of Medicine, Zhejiang University, Hangzhou 310003, China.

\*Correspondence and requests for materials should be addressed to: [wengwj@zju.edu.cn](mailto:wengwj@zju.edu.cn) (W. Weng)

**Table S1.** The positive and negative potential surfaces of the materials promoted the osteogenic differentiation of the cells (positive potential surface (P), negative potential surface (N))

| <b>Material</b>    | <b>Potential properties</b> | <b>Potential strength / charge density</b> | <b>Cell types</b> | <b>Best effect</b> | <b>Reference</b>                                                                     |
|--------------------|-----------------------------|--------------------------------------------|-------------------|--------------------|--------------------------------------------------------------------------------------|
| HA                 | P / N                       | 5.2 $\mu\text{C}/\text{cm}$                | mMSC              | P > N              | <i>Key Engineering Materials</i> <b>2012</b> ,529-530, 357-360                       |
| HA                 | P / N                       | 0.05 $\mu\text{C}/\text{cm}^2$ .           | Wistar rats       | N > P              | <i>Journal of Biomedical Materials Research Part A</i> <b>2010</b> ,79A (3), 627-634 |
| BiFeO <sub>3</sub> | P / N                       | 75 mV (KFM)                                | MSCs              | P > N              | <i>Advanced Functional Materials</i> <b>2017</b> , 27 (47)                           |
| LiNbO <sub>3</sub> | P / N                       | 78 $\mu\text{C}/\text{cm}^2$               | MSCs              | P > N              | <i>Advanced Healthcare Materials</i> <b>2015</b> ,4 (7), 998-1003                    |
| PVDF               | P / N                       | d33=32 pc/N                                | hMSCs             | N > P              | <i>Journal of Biomedical Materials Research Part A</i> <b>2015</b> ,103 (3), 919-928 |

From these results, it could be seen that the relative strength of positive potential and negative potential promoting osteoblastic differentiation of cells is controversial.

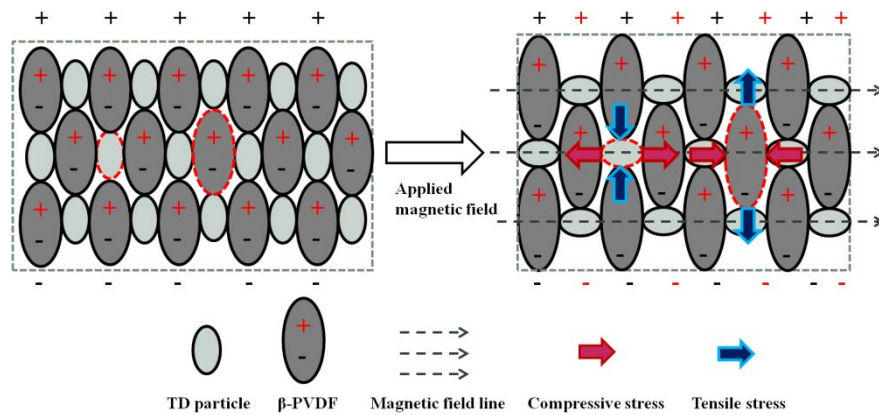

**Figure S1.** The schematic diagram of magneto-electric coupling of TD/P (VDF-TrFE) magneto-electric film. Under the magnetic field drive, the TD particles undergo magnetostriction, squeeze the piezoelectric phase PVDF matrix, and generate magneto-electric coupling to change the surface potential of the films.

**Table S2** Piezoelectric coefficient of 13 % TD/P (VDF-TrFE) magneto-electric film under different electric field strength. The films could be stable poled under the electric field strength of 52 V/ $\mu\text{m}$ , but when the electric field improved to 60 V/ $\mu\text{m}$ , the films were at risk of breakdown.

|                                                             |   |      |      |      |
|-------------------------------------------------------------|---|------|------|------|
| <b>Electric field strength (V/<math>\mu\text{m}</math>)</b> | 0 | 45   | 52   | 60   |
| <b>Positive potential film <math>d_{33}</math> (pc/N)</b>   | 0 | +10  | +12  | +14  |
| <b>Negative potential film <math>d_{33}</math> (pc/N)</b>   | 0 | - 10 | - 12 | - 14 |

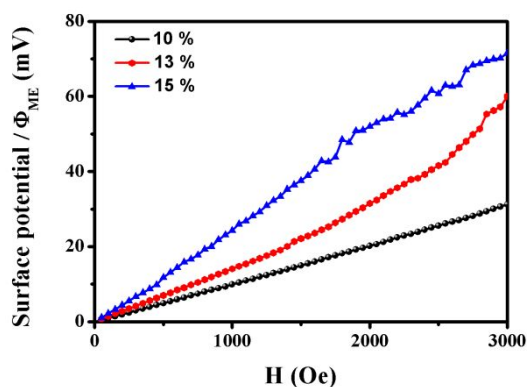

**Figure S2.** The magnetoelectric properties of poled TD/P (VDF-TrFE) magnetoelectric film with different TD weight percentage content. The  $|\phi_{ME}|$  of 13% and 15% film were similar, but the 15 % film was difficult to be polarized, so the 13 % film was the best in magnetoelectric properties in a film that can be stably polarized.

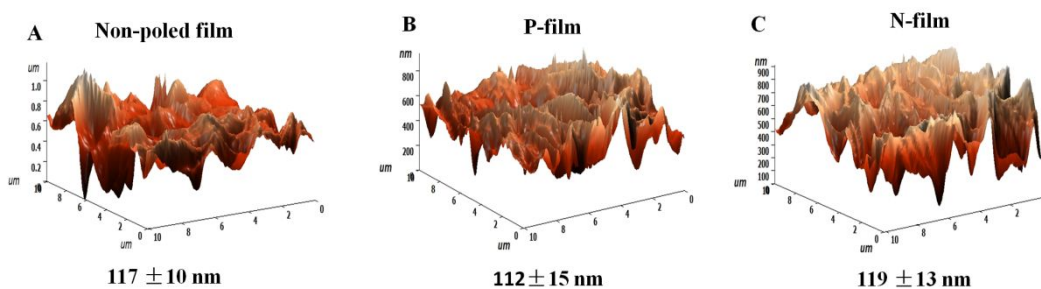

**Figure S3.** The surface average roughness (Ra) of non-poled film (A), positive potential film (P-film) and negative potential film (N-film) (B, C) were determined to  $117 \pm 10$  nm  $112 \pm 15$  nm and  $119 \pm 13$  nm, respectively.

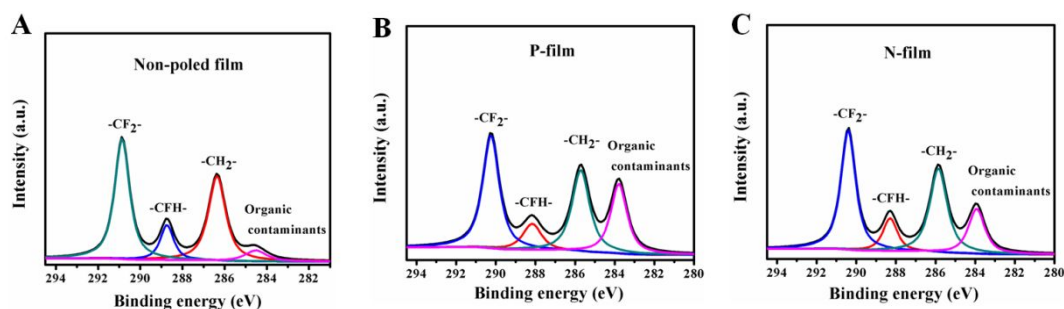

**Figure S4.** C 1s XPS spectra of non-poled film (A), P-film and N-film (B, C), respectively

**Table S3.** Summary of C 1s XPS spectra of 13 % TD/P (VDF-TrFE) magnetoelectric film.

| Sample                  | Bind energy(eV)    |        |                    |                     | Ratio                                 |
|-------------------------|--------------------|--------|--------------------|---------------------|---------------------------------------|
|                         | -CF <sub>2</sub> - | -CFH-  | -CH <sub>2</sub> - | Organic contaminant | -CH <sub>2</sub> -/-CH <sub>2</sub> - |
| Non-poled film          | 290.86             | 288.73 | 286.36             | 284.52              | 0.81                                  |
| Positive potential film | 290.40             | 288.29 | 285.85             | 283.93              | 0.83                                  |
| Negative potential film | 290.24             | 288.12 | 285.71             | 283.79              | 0.78                                  |

**Table S4.** The correlation of thickness of NdFeB magnet with magnetic field intensity generated in PMMA support

| Thickness of the magnet (mm) | Approximate magnetic field intensity (Oe) |
|------------------------------|-------------------------------------------|
| 0                            | 0                                         |
| 10                           | 1400                                      |
| 14                           | 2100                                      |
| 20                           | 2800                                      |
| 25                           | 3200                                      |

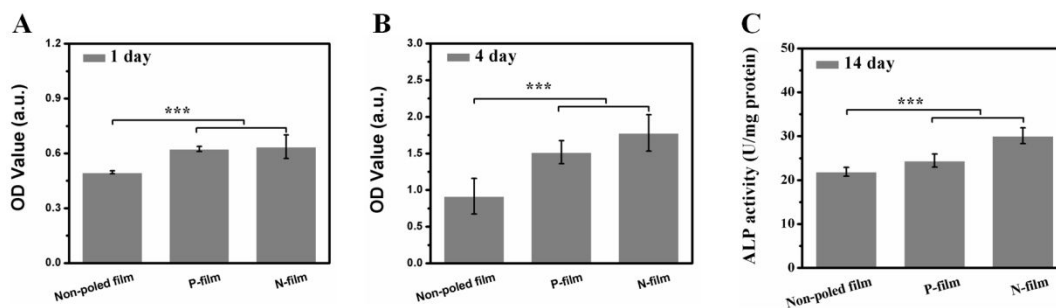

**Figure S5.** The adhesion (A), proliferation (B) and ALP activity (C) of MSCs cultured on non-poled film, P-film and N-film.

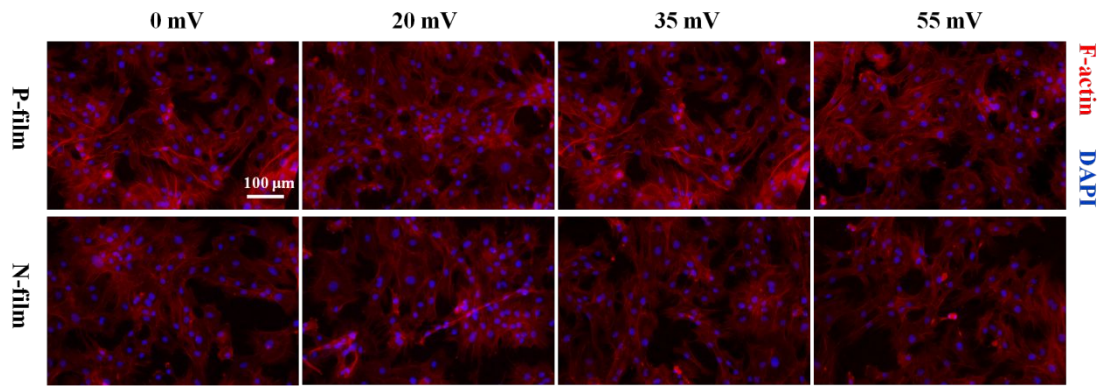

**Figure S6.** Cellular morphology of MSCs on P-film and N-film. The CLSM images of MSCs culture for 7 day

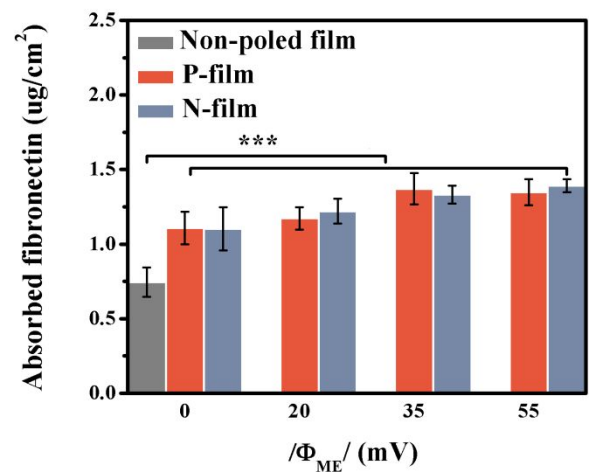

**Figure S7.** Adsorption density of FN protein on non-poled film, P-film and N-film.

**Table S5.** Primers Used for RT-PCR.

| Gene           | forward primer sequence (5'-3') | reverse primer sequence (5'-3') |
|----------------|---------------------------------|---------------------------------|
| $\alpha 5$     | AGACATCCACTCCCTCTACAA           | AGTAGGTCATCTAGCCCATCTC          |
| $\beta 1$      | ATCCAATTGTAGCAGGCGTGGTT         | GACCACAGTTGTCACGGCACTC          |
| Runx-2         | CCTGAACTCTGCACCAAGTCCT          | TCATCTGGCTCAGATAGGAGGG          |
| OCN            | GCAATAAGGTAGTGAACAGACTCC        | CCATAGATGCGTTTGTAGGCGG          |
| $\beta$ -actin | AATGTGGCTGAGGACTTTG             | GGGACTTCCTGTAACCACTTATT         |

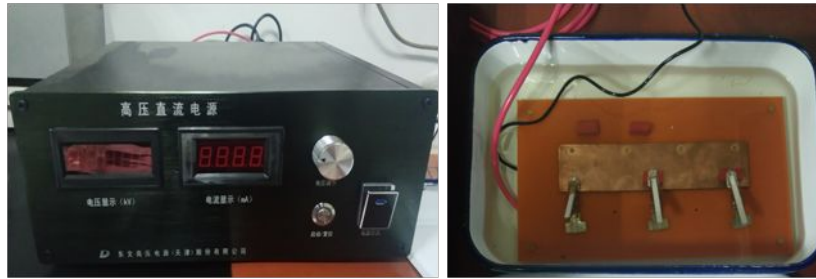

**Figure S8.** High-voltage polarization device.

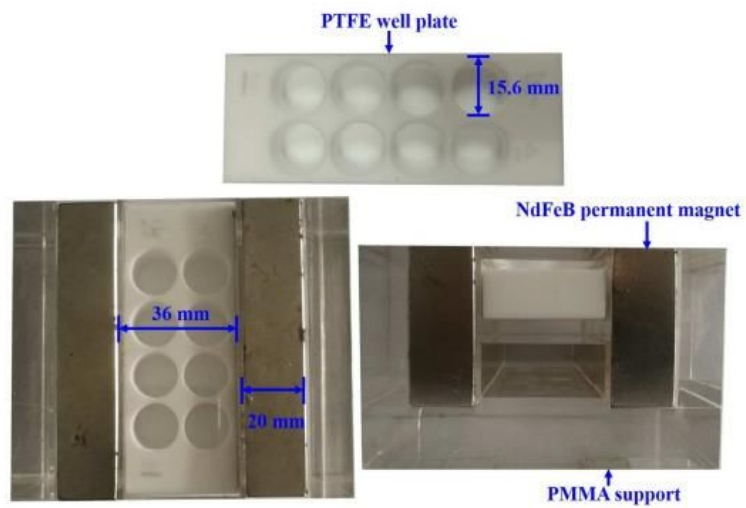

**Figure S9.** Home-mode equipments for cell culture under magnetic field.
